# Supplementary material for: Effectiveness of Herbal Essential Oils as Single and Combined Repellents against Aedes aegypti, Anopheles dirus and Culex quinquefasciatus (Diptera: Culicidae)
Source: MDPI journal article supplement (doi:10.3390/insects13070658), 2022-07-21
Supplement: s1 [file s1]

# Supplementary information: Effectiveness of herbal essential oils as single and combined repellents against *Aedes aegypti*, *Anopheles dirus* and *Culex quinquefasciatus* (Diptera: Culicidae)

Essential oil pairwise results were evaluated with Dunn's test for multiple comparisons, corrected with the Benjamini–Hochberg correction. Significant differences between essential oils were indicated by \* at FWER = 0.1 and \*\* at FWER = 0.05. The labels of each oil were indicated in Table S1. Multiple comparisons of 10 undiluted essential oils and citronella (control) were shown in Table S2A for *Aedes aegypti*, Table S2B for *Anopheles dirus* and Table S2C *Culex quinquefasciatus*. The top row in each cell of pairwise comparison results represents the test statistics whereas the bottom represents the *p*-values.

**Table S1.** Labels of essential oil used in this study.

| Oil |                          | Type   |
|-----|--------------------------|--------|
| 1   | Citronella oil (control) | Single |
| 2   | Anise oil                | Single |
| 3   | Basil oil                | Single |
| 4   | Bergamot oil             | Single |
| 5   | Coriander oil            | Single |
| 6   | Patchouli oil            | Single |
| 7   | Peppermint oil           | Single |
| 8   | Petitgrain oil           | Single |
| 9   | Rosemary oil             | Single |
| 10  | Sage oil                 | Single |
| 11  | Vetiver oil              | Single |

**Table S2A** Pairwise comparisons of undiluted essential oils and citronella (control)  
against *Aedes aegypti*.

|    | 1                   | 10                 | 11                  | 2                    | 3                   | 4                  | 5                   | 6                  | 7                  | 8                   |
|----|---------------------|--------------------|---------------------|----------------------|---------------------|--------------------|---------------------|--------------------|--------------------|---------------------|
| 10 | -0.03628<br>0.4855  |                    |                     |                      |                     |                    |                     |                    |                    |                     |
| 11 | 2.194869<br>0.0775* | 2.231148<br>0.0784 |                     |                      |                     |                    |                     |                    |                    |                     |
| 2  | 1.741384<br>0.132   | 1.777663<br>0.1383 | -0.4534<br>0.4064   |                      |                     |                    |                     |                    |                    |                     |
| 3  | -0.58046<br>0.3677  | -0.54418<br>0.375  | -2.7753<br>0.0506*  | -2.32185<br>0.0795*  |                     |                    |                     |                    |                    |                     |
| 4  | 0.770658<br>0.3277  | 0.811219<br>0.3278 | -1.6838<br>0.141    | -1.17627<br>0.2352   | 1.419634<br>0.1862  |                    |                     |                    |                    |                     |
| 5  | -0.30837<br>0.453   | -0.27209<br>0.4409 | -2.5032<br>0.0564*  | -2.04975<br>0.101    | 0.272091<br>0.4501  | -1.11543<br>0.2348 |                     |                    |                    |                     |
| 6  | 0.807163<br>0.3205  | 0.847724<br>0.3208 | -1.6467<br>0.1442   | -1.13976<br>0.2332   | 1.456138<br>0.1817  | 0.042152<br>0.5014 | 1.151931<br>0.2365  |                    |                    |                     |
| 7  | 0.653019<br>0.3446  | 0.689297<br>0.3373 | -1.5415<br>0.1693   | -1.08837<br>0.2376   | 1.23348<br>0.2214   | -0.04056<br>0.4928 | 0.961389<br>0.2803  | -0.07707<br>0.4964 |                    |                     |
| 8  | -0.73821<br>0.3332  | -0.69765<br>0.3423 | -3.1925<br>0.0388** | -2.68514<br>0.0498** | -0.08923<br>0.5009  | -1.74229<br>0.14   | -0.39344<br>0.4241  | -1.78444<br>0.146  | -1.46831<br>0.186  |                     |
| 9  | 1.922778<br>0.1153  | 1.959057<br>0.1148 | -0.2709<br>0.4596   | 0.181394<br>0.4708   | 2.503239<br>0.0677* | 1.379073<br>0.1924 | 2.231148<br>0.0882* | 1.342568<br>0.1974 | 1.269759<br>0.2159 | 2.887941<br>0.0533* |

**Table S2B** Pairwise comparisons of undiluted essential oils and citronella (control)  
against *Anopheles dirus*.

|    | 1                  | 10                  | 11                 | 2                  | 3                  | 4                  | 5                  | 6                  | 7                   | 8               |
|----|--------------------|---------------------|--------------------|--------------------|--------------------|--------------------|--------------------|--------------------|---------------------|-----------------|
| 10 | -1.77377<br>0.1744 |                     |                    |                    |                    |                    |                    |                    |                     |                 |
| 11 | 1.115381<br>0.28   | 2.795807<br>0.0712* |                    |                    |                    |                    |                    |                    |                     |                 |
| 2  | -0.32965<br>0.4434 | 1.28456<br>0.2736   | -1.3517<br>0.2554  |                    |                    |                    |                    |                    |                     |                 |
| 3  | -0.51028<br>0.3993 | 1.095654<br>0.2591  | -1.5206<br>0.2353  | -0.16896<br>0.4492 |                    |                    |                    |                    |                     |                 |
| 4  | -0.2574<br>0.4472  | 1.360122<br>0.2655  | -1.2841<br>0.2607  | 0.067585<br>0.4731 | 0.236547<br>0.4384 |                    |                    |                    |                     |                 |
| 5  | 0.862501<br>0.3142 | 2.531339<br>0.0625* | -0.2365<br>0.4472  | 1.115152<br>0.2697 | 1.284115<br>0.2489 | 1.047567<br>0.2615 |                    |                    |                     |                 |
| 6  | -1.50231<br>0.2286 | 0.287931<br>0.4431  | -2.5464<br>0.0748* | -1.0352<br>0.2583  | -0.8463<br>0.3122  | -1.11077<br>0.2619 | -2.2819<br>0.0884* |                    |                     |                 |
| 7  | -1.9712<br>0.1488  | -0.2094<br>0.4411   | -2.9771<br>0.08*   | -1.46591<br>0.2308 | -1.277<br>0.231    | -1.54147<br>0.242  | -2.7126<br>0.0612* | -0.49734<br>0.3958 |                     |                 |
| 8  | -0.76195<br>0.3228 | 1.073198<br>0.2596  | -1.8663<br>0.155   | -0.35514<br>0.4415 | -0.16624<br>0.442  | -0.43071<br>0.4167 | -1.6019<br>0.2309  | 0.785267<br>0.3213 | 1.282602<br>0.2387  |                 |
| 9  | 0.519307<br>0.4048 | 2.172417<br>0.1025  | -0.5575<br>0.3968  | 0.794124<br>0.3263 | 0.963086<br>0.2796 | 0.726539<br>0.3297 | -0.3213<br>0.4378  | 1.923062<br>0.1498 | 2.353767<br>0.0852* | 1.243<br>0.2353 |

**Table S2C** Pairwise comparisons of undiluted essential oils and citronella (control)  
against *Culex quinquefasciatus*.

|    | 1                    | 10                 | 11                   | 2                  | 3                    | 4                  | 5                    | 6                   | 7                  | 8                  |
|----|----------------------|--------------------|----------------------|--------------------|----------------------|--------------------|----------------------|---------------------|--------------------|--------------------|
| 10 | 1.483844<br>0.1723   |                    |                      |                    |                      |                    |                      |                     |                    |                    |
| 11 | 3.788799<br>0.0042** | 2.023901<br>0.0844 |                      |                    |                      |                    |                      |                     |                    |                    |
| 2  | 1.882333<br>0.0967*  | 0.372751<br>0.3981 | -1.62541<br>0.1363   |                    |                      |                    |                      |                     |                    |                    |
| 3  | 1.085356<br>0.2634   | -0.37275<br>0.4064 | -2.42239<br>0.0424** | -0.7455<br>0.3135  |                      |                    |                      |                     |                    |                    |
| 4  | 2.61639<br>0.0305**  | 1.059399<br>0.2567 | -0.89136<br>0.2847   | 0.686647<br>0.3223 | 1.432151<br>0.1673   |                    |                      |                     |                    |                    |
| 5  | 0.833679<br>0.3006   | -0.60817<br>0.3473 | -2.67407<br>0.0343** | -0.98093<br>0.2642 | -0.23542<br>0.4389   | -1.66757<br>0.1312 |                      |                     |                    |                    |
| 6  | 3.727963<br>0.0027** | 2.09918<br>0.0757* | 0.220217<br>0.4367   | 1.726429<br>0.1287 | 2.471932<br>0.0411** | 1.039781<br>0.2487 | 2.707354<br>0.0373** |                     |                    |                    |
| 7  | 1.461151<br>0.1721   | -0.13108<br>0.4561 | -2.32765<br>0.0457** | -0.52957<br>0.3645 | 0.267406<br>0.434    | -1.26363<br>0.2102 | 0.519083<br>0.3609   | -2.3752<br>0.0438** |                    |                    |
| 8  | 0.602975<br>0.3416   | -0.82398<br>0.2967 | -2.90477<br>0.0253** | -1.19673<br>0.2273 | -0.45123<br>0.3814   | -1.88338<br>0.1025 | -0.2158<br>0.4302    | -2.9231<br>0.0318** | -0.74979<br>0.3197 |                    |
| 9  | 2.61639<br>0.0349**  | 1.059399<br>0.2653 | -0.89136<br>0.2929   | 0.686647<br>0.3302 | 1.432151<br>0.1743   | 0<br>0.5           | 1.667573<br>0.1381   | -1.0397<br>0.2565   | 1.263627<br>0.2183 | 1.883377<br>0.1094 |
